# Supplementary material
Source: publisher figshare collection journal article supplement (https://acs.figshare.com/ndownloader/files/4851595)
Supplement: Supplementary file 1 [file 4851595]

## Supporting Information

### **A Techno-Economic Assessment of Hybrid Cooling Systems for Coal- and Natural-Gas-fired Power Plants with and without Carbon Capture and Storage**

Haibo Zhai\* and Edward S. Rubin

Department of Engineering and Public Policy, Carnegie Mellon University, Pittsburgh, PA

\* Corresponding author. Tel.: +1 412 268 1088; Fax: +1 412 268 3757; Email address: hbzhai@cmu.edu

The following supporting information provides additional tables that report the capital, operating and maintenance cost components of hybrid cooling systems, the fuel properties, and the major performance parameters of amine-based carbon capture systems in the IECM.

*2 supporting pages and 5 supporting tables*

**Table S-1 Capital Cost Components of Wet Cooling Unit**

| <b>Process Area Costs</b>              | <b>Wet Cooling Unit Costs</b>         |
|----------------------------------------|---------------------------------------|
| Cooling tower structure                | Process facilities capital            |
| Circulation pumps                      | General facilities capital            |
| Auxiliary systems                      | Engineering. & home office fees       |
| Piping                                 | Process contingency cost              |
| Makeup water system                    | Project contingency cost              |
| Component cooling water system         | Interest charges                      |
| Foundation & structures                | Royalty fees                          |
| Cooling tower structure                | Preproduction (startup) cost          |
|                                        | Inventory capital                     |
| Process Facilities Capital (sum above) | Total Capital Requirement (sum above) |

**Table S-2 Operating and Maintenance Cost Components of Wet Cooling Unit**

| <b>Variable Cost Component</b>  | <b>Fixed Cost Component</b> |
|---------------------------------|-----------------------------|
| Electricity                     | Operating labor             |
| Water                           | Maintenance labor           |
|                                 | Maintenance material        |
|                                 | Admin. & support labor      |
| Total Variable Cost (sum above) | Total O&M Cost (sum above)  |

**Table S-3 Capital Cost Components of Dry Cooling Unit**

| <b>Process Area Costs</b>              | <b>Dry Cooling Unit Costs</b>         |
|----------------------------------------|---------------------------------------|
| Condenser structure                    | Process facilities capital            |
| Steam duct support                     | General facilities capital            |
| Electrical & control equipment         | Engineering. & home office fees       |
| Auxiliary cooling                      | Process contingency cost              |
| Cleaning system                        | Project contingency cost              |
|                                        | Interest charges                      |
|                                        | Royalty fees                          |
|                                        | Preproduction (startup) cost          |
|                                        | Inventory capital                     |
| Process Facilities Capital (sum above) | Total Capital Requirement (sum above) |

**Table S-4 Fuel Properties in IECM Database**

| <b>Coal Property*</b>        | <b>Value</b> | <b>Natural Gas Property</b>  | <b>Value</b> |
|------------------------------|--------------|------------------------------|--------------|
| Higher heating value (kJ/kg) | 2.71E+04     | Higher heating value (kJ/kg) | 5.23E+04     |
| Composition (wt.%)           |              | Composition (vol.%)          |              |
| carbon                       | 63.75        | methane                      | 93.1         |
| hydrogen                     | 4.5          | ethane                       | 3.2          |
| oxygen                       | 6.88         | propane                      | 1.1          |
| chlorine                     | 0.29         | carbon dioxide               | 1.0          |
| sulfur                       | 2.51         | oxygen                       | 0.0          |
| nitrogen                     | 1.25         | nitrogen                     | 1.6          |
| ash                          | 9.7          | hydrogen sulfide             | 0.0          |
| moisture                     | 11.12        |                              |              |

\* The Illinois #6 coal in the IECM fuel database is used as the surrogate fuel for PC plants.

**Table S-5 Major Performance Parameters of Amine-based Carbon Capture Systems in IECM**

| <b>Parameter</b>                                                   | <b>Value</b>         |
|--------------------------------------------------------------------|----------------------|
| CO <sub>2</sub> removal efficiency (%)                             | 90                   |
| Sorbent concentration (wt%)                                        | 30                   |
| Lean CO <sub>2</sub> loading (mol.CO <sub>2</sub> /mol. solv.)     | 0.19                 |
| Liquid-to-gas ratio                                                | 3.06 (PC)/1.18(NGCC) |
| Regeneration heat requirement ( kJ/kg CO <sub>2</sub> )            | 3524 (PC)/3954(NGCC) |
| Heat-to-electricity efficiency (%)                                 | 18.7 (PC)/19.7(NGCC) |
| CO <sub>2</sub> product pressure (MPa)                             | 13.8                 |
| CO <sub>2</sub> compression power use (kWh/tonne CO <sub>2</sub> ) | 93                   |
| Cooling duty (t H <sub>2</sub> O/t CO <sub>2</sub> )               | 91(PC)/123(NGCC)     |
